# Supplementary material for: Antibiotic collateral sensitivity is contingent on the repeatability of evolution
Source: PubMed Central journal article supplement (PMC6338734; doi:10.1038/s41467-018-08098-6), 2019-01-18
Supplement: 41467_2018_8098_MOESM3_ESM.pdf [file 41467_2018_8098_MOESM3_ESM.pdf]

## **Description of Additional Supplementary Files**

File Name: Supplementary Data 1

Description: Excel tables containing the triplicate MIC measurements and maximum likelihood estimates for the parental strain and X1-X60 to each of the drugs listed in Supplementary Table 1. P-values for the log-rank test for change from parental sensitivity are reported. The values in the tables are not corrected for multiple hypothesis testing. The triplicate measurement of the MICs for X1-X12 at passages 2, 4, 6, 8 and 10 are also presented.

File Name: Supplementary Data 2

Description: Comparison of MICs with %chromosomally aligning reads for X1- X12.
